# Supplementary material
Source: PubMed Central journal article supplement (PMC2963074)
Supplement: NIHMS239163-supplement-Table_1.pdf [file NIHMS239163-supplement-Table_1.pdf]

**Enriched genes (3 known genes)**

inhibitor of DNA binding 2  
tetraspan 2  
parp 3

**UI vs.  $\alpha 6^{all}$** 

2.2  
3.1  
5.8

**bulge vs.  $\alpha 6^{all}$** 

7.6  
6.8  
2.7

**Down-regulated genes (62 known genes)**

pleckstrin homology-like domain, B2  
solute carrier family 2, member 12  
abnormal spindle-like, microcephaly associated  
wingless-related MMTV integration site 3A  
cyclin B1, related sequence 1  
centromere autoantigen F  
cyclin A2  
SRY-box containing gene 6  
kinesin family member 22  
hepatic leukemia factor  
transglutaminase 3  
complement component 2 (within H-2S)  
R-spondin 3 homolog  
adenylate cyclase 3  
centromere protein E  
kinesin family member 20A  
guanine nucleotide binding protein, alpha 14  
cysteinyl leukotriene receptor 1  
hyaluronan mediated motility receptor (RHAMM)  
wingless-related MMTV integration site 6  
cell division cycle associated 3  
cell division cycle 20 homolog  
Rac GTPase-activating protein 1  
cyclin-dependent kinase inhibitor 3  
special AT-rich sequence binding protein 1  
solute carrier family 2, member 5  
laminin, alpha 1  
deiodinase, iodothyronine, type II  
cell division cycle associated 1  
hyaluronan synthase 3  
roundabout homolog 1  
SRY-box containing gene 4  
solute carrier family 16, member 9  
caspase recruitment domain family, member 10  
M-phase phosphoprotein 1  
cell division cycle associated 2  
inositol polyphosphate multikinase  
structural maintenance of chromosomes 2-like 1  
desmoglein 2  
Rho GTPase activating protein 11A  
plakophilin 4  
cell division cycle associated 5  
barren homolog  
protein tyrosine phosphatase, receptor type Z  
diaphanous homolog 3  
Shc SH2-domain binding protein 1  
kinetochore associated 1  
RAD51 homolog  
transforming, acidic coiled-coil containing protein 3  
spindle pole body component 24 homolog  
ubiquitin-conjugating enzyme E2T (putative)  
ubiquitin-like, containing PHD and RING finger domains, 1  
matrix metalloproteinase 3  
claspin homolog  
RAR-related orphan receptor alpha  
myeloid ecotropic viral integration site-related gene 1  
E2F transcription factor 7  
thymidine kinase 1  
trinucleotide repeat containing 9  
gap junction membrane channel protein alpha 1  
helicase, lymphoid specific  
eukaryotic translation initiation factor 2C, 4

11.1  
11.1  
8.9  
8.6  
7.9  
7.4  
7.4  
7.3  
6.9  
6.9  
6.8  
6.6  
6.0  
6.0  
5.9  
5.9  
5.9  
5.8  
5.8  
5.7  
5.5  
5.3  
5.3  
5.3  
5.2  
4.8  
4.7  
4.6  
4.5  
4.4  
4.4  
4.3  
4.3  
4.2  
4.1  
3.8  
3.8  
3.8  
3.5  
3.5  
3.4  
3.4  
3.4  
3.4  
3.4  
3.2  
3.2  
3.2  
3.1  
3.0  
3.0  
3.0  
3.0  
3.0  
2.9  
2.9  
2.7  
2.7  
2.6  
2.6  
2.6  
2.5  
2.3

6.7  
5.8  
9.4  
8.3  
9.6  
12.3  
8.7  
7.2  
7.4  
7.1  
6.6  
4.3  
6.8  
2.8  
9.1  
6.3  
6.0  
5.8  
7.0  
6.3  
6.4  
7.2  
9.7  
4.9  
4.8  
4.5  
4.5  
4.3  
5.4  
4.6  
4.5  
3.6  
4.3  
3.7  
4.8  
4.7  
5.3  
4.0  
3.0  
7.4  
4.4  
4.4  
5.4  
3.7  
3.6  
5.1  
4.2  
3.9  
3.6  
4.2  
4.0  
3.4  
2.8  
3.3  
2.9  
3.2  
2.8  
4.8  
2.6  
2.2  
2.6  
2.3
